# Supplementary material
Source: Springer Nature journal article supplement (https://www.springermedizin.de/resource/supplementary/12889_2013_6619_MOESM2_ESM.pdf/9498588)
Supplement: MOESM2 [file 9498588]

**Stage 1: Intervention model**

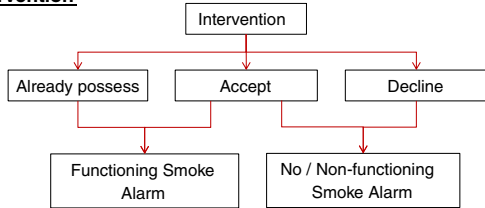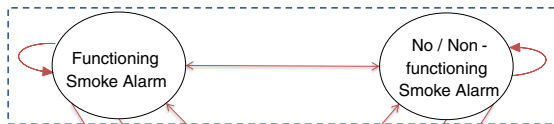

Fire-related Injury

Death: Fatal fire-related injury

Death: Other causes

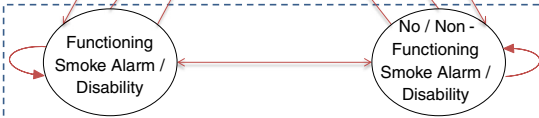

**Stage 3: Long-term model (yrs 6 to 100)**

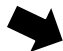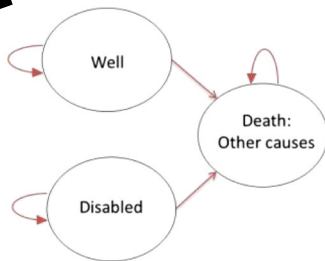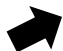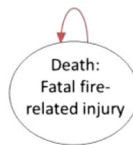

**Stage 2: Pre-school Model (yrs 1 to 5)**
